# Supplementary material for: Current status of assisted reproductive technology in Korea, 2010
Source: PubMed Central journal article supplement — Clin Exp Reprod Med. 2015 Mar 31;42(1):8–13. doi: 10.5653/cerm.2015.42.1.8 (PMC4390679; doi:10.5653/cerm.2015.42.1.8), 2015-03-31
Supplement: cerm-42-8-s001.pdf [file cerm-42-8-s001.pdf]

## Supplementary materials

**Supplement 1.** Seventy-six *in vitro* fertilization centers participated in 2010 survey.

| 지역 | 센터             | 지역  | 센터              |
|----|----------------|-----|-----------------|
| 강릉 | 미즈산부인과의원       | 서울  | 신촌세브란스병원        |
| 고양 | 동국대학교 일산병원     | 서울  | 에이치큐브병원         |
| 고양 | 동원산부인과의원       | 서울  | 을지병원            |
| 광주 | 미래와희망 산부인과의원   | 서울  | 이화의대부속 목동 병원    |
| 광주 | 은병원            | 서울  | 장스여성병원          |
| 광주 | 전남대학교병원        | 서울  | 차병원             |
| 광주 | 조선대학교병원        | 서울  | 한나산부인과의원        |
| 광주 | 프레메디 산부인과의원    | 서울  | 한양대학교병원         |
| 대구 | 경북대학교병원        | 서울  | 함춘여성의원          |
| 대구 | 계명대학교동산병원      | 성남  | 메디파크산부인과병원      |
| 대구 | 마리아의원          | 성남  | 분당제일여성병원        |
| 대구 | 미래여성병원         | 성남  | 분당차병원           |
| 대구 | 성모여성병원         | 수원  | 시온여성병원          |
| 대구 | 신세계여성병원        | 수원  | 아주대학교병원         |
| 대전 | 마리아의원          | 수원  | 연세모아병원          |
| 부산 | 동아대학교병원        | 울산  | 마마파파&베이비 산부인과의원 |
| 부산 | 마리아의원          | 울산  | 프라우메디병원         |
| 부산 | 부산대학교병원        | 원주  | 원주기독병원          |
| 부산 | 부산백병원          | 의정부 | 신여성병원           |
| 부산 | 삼성제일산부인과       | 이천  | 양정분산부인과의원       |
| 부산 | 아름병원           | 익산  | 제일산부인과의원        |
| 부산 | 일신기독병원         | 인천  | 가천대 길병원         |
| 부산 | 좋은문화병원         | 인천  | 삼성미즈산부인과        |
| 부산 | 한나여성병원         | 인천  | 서울여성병원          |
| 부산 | 해운대백병원         | 인천  | 인하대학교 의과대학 부속병원 |
| 부천 | 마리아의원          | 일산  | 마리아의원           |
| 부천 | 삼성미래산부인과       | 전주  | 전북대학교병원         |
| 부천 | 서울여성병원         | 전주  | 진산부인과의원         |
| 서울 | 강남미즈메디병원       | 제주  | 마리아병원           |
| 서울 | 강서미즈메디병원       | 제주  | 차산부인과의원         |
| 서울 | 경희의대부속병원       | 진주  | 가야자모병원          |
| 서울 | 고려대학교의과대학 부속병원 | 진주  | 경상대학교병원         |
| 서울 | 마리아병원          | 진주  | 이도근산부인과의원       |
| 서울 | 마리아플러스병원       | 창원  | 엘르메디산부인과의원      |
| 서울 | 메디아여성병원        | 청주  | 이화산부인과의원        |
| 서울 | 삼성서울병원         | 청주  | 프리모산부인과의원       |
| 서울 | 서울대학교병원        | 춘천  | 아름다운산부인과        |
| 서울 | 서울아산병원         | 포항  | 아이맘산부인과         |
