# Supplementary material for: Current status of assisted reproductive technology in Korea, 2010
Source: PubMed Central journal article supplement — Clin Exp Reprod Med. 2015 Mar 31;42(1):8–13. doi: 10.5653/cerm.2015.42.1.8 (PMC4390679; doi:10.5653/cerm.2015.42.1.8), 2015-03-31
Supplement: cerm-42-8-s002.pdf [file cerm-42-8-s002.pdf]

## 2010년도 보조생식술 시술결과 입력 파일 (2013-7-23)

### 정보 입력 전 반드시 알아야 할 일반적인 내용

- 본 보고는 대한보조생식학회 책임 하에서 모두 이루어집니다.

- 본 학회 조사는 난임 진단과 치료와 관련된 변수와 결과 추이를 확인하기 위한 것으로 국내보조생식술에 관한 기본 자료가 될 것입니다.
- 아래 첨부된 “보조생식술 시술결과 입력 모듈”은 전세계 공통 양식인 ICMART의 World Report on ART, 2009를 기본 골격으로 하고 있어 다소간 국내 현실과 맞지 않는 부분이 있다는 점을 이해해주시길 바랍니다.
- 대한보조생식학회가 입력 데이터 안전성과 보안책에 대해 책임을 질 것입니다.

- 입력 정보는 기명으로 제출되나, 공개되는 자료는 어떠한 형태로든 익명으로 발표될 것입니다.

- 또한 입력 정보는 논문 발표 전까지 언제든지 수정이 가능합니다.
- 자료 공개 후 수정은 불가능할 수 있습니다. 이러한 이유로 자료 입력 시 충분한 주의를 기울여 주십시오.

- 작성 시 의문점이 있으신 경우나 수정 또는 개선점이 있으시면 부천서울여성병원 이경훈 전문의 (HP: 010-5225-6751, E-mail: ghleeobgy@gmail.com)에게 연락 주십시오.

### 정보 입력 전 반드시 알아야 할 세부 내용

- 올해 입력 대상 자료는 ‘2010년 1월 1일에서부터 2010년 12월 31일’ 사이에 시작한 모든 시술에 관한 자료와 해당 시술과 연관된 임신 자료입니다.

- 시작이란 시술 관련 약물 투여 시작일을 말합니다(피임약 투여는 제외).

- 다만, (기관에 따라서) 약물 투여 시작일로 확인하지 못한 경우 2010년 1월 1일에서부터 2010년 12월 31일까지 난자를 채취한 날짜를 기준으로 입력하여도 됩니다. [이 경우 난자 채취 자료에 명시, 약물 투여 시작일 자료(추천)]

- 난소 자극 후 난자 채취 시도를 하였으나 난자가 나오지 않는 경우도 포함됩니다.  
(the cycle with aspiration performed, including aspiration without oocytes retrieved)
- 난소 자극을 하였으나 난자 채취가 여러 이유로 취소된 경우도 포함됩니다.  
(the cancelled cycles for which an aspiration was scheduled for the year being scheduled)

■ 보조생식 시술은 다음 7개 항목으로 구분하여 수집될 것입니다.

[이 항목들의 대상은 상호 중첩되지 않으니 숫자 기입 시 유의하셔야 합니다]

- Standard IVF (IVF without ICSI)
- ICSI (IVF with ICSI)
- GIFT
- FET (Frozen Embryo Transfer) after standard IVF
- FET (Frozen Embryo Transfer) after ICSI
- Oocyte donation
- 기타 사항

■ 개별 항목에 대한 정의는 다음과 같습니다.

- 고식적 체외수정 주기(Standard IVF): 연구실에서 고식적인 방법으로 수정시킨 후 자궁에 신선 배아를 이식한 주기
- 난자세포질 내 정자주입술 주기(ICSI): 채취된 난자를 대상으로 ICSI를 이용한 수정 시도하여 생성된 배아 일부를 이식한 주기
- Half ICSI에 관한 내용 중 중요 내용
  - 주기에서 채취한 난자를 대상으로 고식적 체외 수정과 ICSI 수정을 동시에 사용한 경우를 칭합니다.
  - 이 경우, 이식된 배아가 생성된 수정 방법을 기준으로 한다.  
(for cycles where both conventional IVF and ICSI were used, report cycle in the column of the technique that resulted in the transferred embryos)
  - 즉, 채취 난자를 대상으로 half ICSI (IVF+ICSI)를 했으나 이식된 배아가 고식적 IVF로 생성된 배아인 경우, 고식적 IVF 주기로 한다.
  - 어떤 배아를 이식했는지 모르거나, 고식적 배아와 ICSI 배아를 모두 이식한 경우는 ICSI 주기로 한다.  
(if both type of embryos were transferred, count as ICSI)
- GIFT: 생식세포(난자와 정자)를 일정한 처치 후 나팔관에 이식한 주기
  - 동일 주기에 GIFT와 고식적 IVF와 함께 시행한 경우는 고식적 IVF 주기로 기재
- 클리닉에서 정의하고 있는 행위가 다를 경우, 각주 처리하여 해당 내용을 기록하여 주십시오.

## 입력 내용과 차례

- 난임클리닉 일반 정보
- 입력 책임자 상세 정보
- (IVF, ICSI, GIFT) 치료에 따른 임신 결과
  - A. 임신 결과 입력 항목
  - B. 이식 배아 수에 따른 임상적 임신율
  - C. IVF (without ICSI)로 인한 분만 수
  - D. ICSI로 인한 분만 수
- 냉동 배아 이식 시술에 따른 임신 결과
  - A. 임신 결과 입력 항목
    - i. 일반 항목
    - ii. 특수 항목
  - B. 이식 배아 수에 따른 임상적 임신율
  - C. 냉동 배아 이식으로 인한 분만 수
- 시술받은 여성의 나이에 따른 시술 종류
  - A. 신선 주기(fresh cycle)
  - B. 해동 배아 이식 주기(frozen embryos transfer cycle)
- PGD에 관한 보고
- 남자 냉동에 관한 보고
- 체외 성숙(IVM)에 관한 보고
- 남자 기증(OD)에 관한 보고
- 태아감수술(SFR)에 관한 보고
- 체외수정시술 합병증에 관한 보고
- 정자채취방법에 따른 정보 보고

## 2010년 보조생식술 시술결과 입력 모듈 (ART Report Forms Module, Korea 2010)

■ **난임클리닉 일반 정보**

|                      |                                 |
|----------------------|---------------------------------|
| 난임 클리닉 한글 이름         |                                 |
| 난임 클리닉 영문 이름         |                                 |
| 난임 클리닉 주소 (정확히)      |                                 |
| 2010년 시행한 보조생식술 총 개수 |                                 |
| 입력 자료 성격             | 약물 투여 시작일 자료 (추천) / 난자 채취 날짜 자료 |

- A. ICMART에 정보를 제출할 때, 기관 이름을 영문명으로 보고합니다. 정확한 영문 기관 이름을 적어주십시오.
- B. '2010년 1월 1일에서부터 2010년 12월 31일' 사이에 시작한 모든 시술에 관한 자료와 해당 시술입니다(국가지원 시술 건수 + 환자 자비 시술 건수).
- C. 입력 자료 성격에는 O/X 표시를 하거나, 삭제해주시시오.

■ **입력 책임자 상세 정보**

|                     |  |
|---------------------|--|
| 입력 책임자 이름           |  |
| 직통 전화 번호(핸드폰 번호 가능) |  |
| e-mail              |  |

- A. 위의 칸에 최종 책임자에 대한 이름과 전화번호, 이메일을 정확히 기재해주시시오.

## ■ (IVF, ICSI, ZIFT, GIFT) 치료에 따른 임신 결과

### A. 임신 결과 입력항목

#### i. 입력 시 주의 사항

1. 신선 주기 배아 이식만이 입력 대상입니다.

##### A. 제외 항목

- i. 냉동 배아 이식 주기
- ii. PGD 또는 PGS를 시행한 주기(별도 입력 테이블 존재)
- iii. 난자 공여(OD)로 배아를 생성한 경우(별도 입력 테이블 존재)
- iv. 냉동 난자(oocyte freezing)를 이용하여 배아를 생성한 경우

##### B. 체외 성숙(IVM)

- i. 체외 성숙 후 IVF는 IVF란에 입력, 체외 성숙 후 ICSI는 ICSI란에 입력

##### C. 보조부화술(AH)

- i. 보고 대상이 아닙니다.

##### D. 냉동배아와 함께 이식을 한 경우

- i. 신선 배아와 이전 냉동된 배아를 해동하여 함께 이식한 경우는 신선 배아 주기로 합니다.  
(if both fresh and frozen embryos are transferred in a single cycle, report as a fresh embryo transfer cycle)

2. 자료는 '2010년 1월 1일에서부터 2010년 12월 31일' 사이에 시작한 모든 시술이 대상입니다.

3. 약물 투여를 시작한 주기 총 수(initiated cycle)라 함은, (불임 치료를 하기 위한 목적을 가지고) 난소 자극을 위해 특정 약물을 처치한 주기와 자연 주기를 위해 난포 모니터링을 한 경우를 말하며, 난자 채취를 위한 난포 흡입 시술 시행 여부랑 무관합니다.

(an ART cycle in which the woman receive specific medication for ovarian stimulation or monitoring in the case of natural cycles, with the intention to treat, irrespective of whether or not follicular aspiration is attempted)

4. 난자 채취한 주기(aspiration)에는 채취를 시도했으나 난자가 나오지 않는 경우도 포함됩니다.

(include attempted aspiration in which no eggs were recovered)

5. Half ICSI에 관한 내용 중 중요 내용

A. 고식적 체외 수정과 ICSI 수정을 동일 주기에서 동시에 사용한 경우를 칭한다.

B. 이 경우, 이식된 배아가 생성된 수정 방법을 기준으로 한다.

- i. 즉, half ICSI를 했으나 이식된 배아가 고식적 IVF로 생성된 배아인 경우, 고식적 IVF 주기로 한다.
- ii. 어떤 배아를 이식했는지 모르거나, 고식적 배아와 ICSI 배아를 모두 이식한 경우는 ICSI IVF 주기로 한다.

6. 배아 이식 시행 총 시술 주기는 1개 배아 이식-6개 이상 배아 이식 개수의 총합이어야 합니다.

7. GIFT<sup>5</sup>에서는 1개의 난자를 입력한 경우, 2개의 난자를 이식한 경우로 나누어 입력합니다.

8. 이식하지 않고 배아를 모두 냉동한 주기(freezing without transfers)<sup>6</sup>라 함은 의학적 이유나 개인적인 이유로 해당 주기에 이식하지 않는 주기를 말한다.

9. 이식을 했으나, 잉여 배아가 있어 냉동한 주기 수(no of cycle with freezing surplus embryo)<sup>7</sup>라 함은 이식 후 잉여 배아가 남아 냉동한 주기 수(no of cycle)를 말한다.

10. 입력 시 최대한 관련 항목에 빈틈없이 입력해주시시오.

- A. 특정 항목에 관한 시술이 할 수 있으나 케이스가 없는 경우, 빈칸으로 두지 말고 '0'이라고 표기하십시오.
- B. 특정 항목에 관한 자료를 시행하지 않거나 알 수 없는 경우, 해당 없음(또는 NA)으로 표기하십시오.
- C. 어떠한 항목도 빈칸으로 두지 마세요.

ii. 입력 항목

|                                                                                        | 고식적 IVF (n)                 | ICSI 시행 (n) | GIFT (n)            |
|----------------------------------------------------------------------------------------|-----------------------------|-------------|---------------------|
| 약물 투여를 시작한 주기 총 수<br>(initiated cycle)                                                 |                             |             |                     |
| 난자 채취를 한 주기 총 수(aspiration)                                                            |                             |             |                     |
| 배아 이식(embryo transfer)                                                                 | 이 칸에는 아무런 숫자도 입력하지 않아야 합니다. |             |                     |
| 1개 배아 이식 수(cycle)                                                                      | A)                          |             | <sup>5</sup> (GIFT) |
| 2개 배아 이식 수(cycle)                                                                      | B)                          |             |                     |
| 3개 배아 이식 수(cycle)                                                                      | C)                          |             |                     |
| 4개 배아 이식 수(cycle)                                                                      | D)                          |             |                     |
| 5개 배아 이식 수(cycle)                                                                      | E)                          |             |                     |
| 6개 배아 이상 이식 수(cycle)                                                                   | F)                          |             |                     |
| 배아 이식 시행 총 시술 주기                                                                       | (A+B+C+D+E+F)               |             |                     |
| 이식하지 않고 배아를 모두 냉동한 주기<br>(freezing without transfer) <sup>6</sup>                      |                             |             | ----                |
| 이식을 했으나, 잉여 배아가 있어 냉동한 주기 수<br>(no of cycle with freezing surplus embryo) <sup>7</sup> |                             |             | ----                |

B. 이식 배아 수에 따른 임상적 임신율

i. 입력 시 주의 사항

1. 임상적 임신(clinical pregnancy)은 초음파에서 자궁 내 태낭을 확인한 경우로 제한됩니다.  
(evidence of pregnancy by ultrasound parameter: visualization of a gestational sac)
  - A. 개별 테이블에 기재토록 하고 있는 임상적 임신(clinical pregnancy)은 2010년에 시행한 시술 주기로 임신이 성립된 경우를 말하며, 혈중  $\beta$ -hCG만의 상승이 있는 화학적 임신은 포함되지 않습니다.
    - i. 초음파 검사상 자궁 내(intrauterine) 임신낭이 보인 경우만 임상적 임신(clinical pregnancy)에 포함
    - ii. 자궁 외 임신은 제외
    - iii. 다태 임신인 경우라도 '한 개의 임상적 임신(1 clinical pregnancy)'으로 계산합니다.  
(multiple gestational sacs in one patient are counted as one clinical pregnancy)
2. 유산이라 함은 자궁 내 임신이 임상적으로 확인되었으나, 임신 20주 이전 유산된 경우(인공 유산과 자연 유산, 자궁 외 임신을 포함)
  - A. 모두 유산된 경우라 함은 정상 임신낭이 여러 개 또는 한 개가 관찰되었으나, 모두 유산되어 임신이 조기 종결된 경우  
(No of all abortion)
  - B. 부분 유산된 경우라 함은 정상 임신낭이 여러 개가 관찰되었으나, 이 중 하나의 태낭은 20주 이후까지 지속되었으나 남은 태낭은 유산된 경우(복합 임신으로 진단 후 치료, 이후 정상 임신은 지속한 경우 포함)(No of partial abortion)
3. 입력 시 최대한 관련 항목에 빈틈없이 입력해주시시오.
  - A. 특정 항목에 관한 시술이 할 수 있으나 케이스가 없는 경우, 빈칸으로 두지 말고 '0'이라고 표기하십시오.
  - B. 특정 항목에 관한 자료를 시행하지 않거나 알 수 없는 경우, 해당 없음(또는 NA)으로 표기해주시시오.
  - C. 어떠한 항목도 빈칸으로 두지 마세요.

ii. 입력 항목

|                                       | 이식 배아 수                     |   |   |   |   |     | Total |
|---------------------------------------|-----------------------------|---|---|---|---|-----|-------|
|                                       | 1                           | 2 | 3 | 4 | 5 | ≥ 6 |       |
| 이식 주기                                 |                             |   |   |   |   |     |       |
| 임상적 임신 (1+2+3)                        |                             |   |   |   |   |     |       |
| 모두 유산된 경우<br>(No of all abortion)     |                             |   |   |   |   |     |       |
| 부분 유산된 경우<br>(No of partial abortion) |                             |   |   |   |   |     |       |
| 태낭                                    | 이 칸에는 아무런 숫자도 입력하지 않아야 합니다. |   |   |   |   |     |       |
| 1개 태낭 <sup>1)</sup>                   |                             |   |   |   |   |     |       |
| 2개 태낭 <sup>2)</sup>                   |                             |   |   |   |   |     |       |
| 3개 이상 태낭 <sup>3)</sup>                |                             |   |   |   |   |     |       |

C. IVF (without ICS)시술로 인한 분만 수

i. 입력 시 주의 사항

1. 입력 항목은 신생아 수가 아닌 분만 수입니다.
  - A. 즉, 쌍둥이 분만을 한 경우, 2가 아닌 1로 입력해야 합니다.
  - B. 또한 삼태아 분만인 경우도 3이 아닌 1로 입력해야 합니다.
2. 유산이라 함은 자궁 내 임신이 임상적으로 확인되었으나, 임신 20주 이전 유산된 경우(인공 유산과 자연 유산, 자궁 외 임신을 포함)
  - A. 모두 유산된 경우라 함은 정상 임신낭이 여러 개 또는 한 개가 관찰되었으나, 모두 유산되어 임신이 조기 종결된 경우 (no of all pregnancy losses)
  - B. 부분 유산된 경우라 함은 정상 임신낭이 여러 개가 관찰되었으나, 이 중 하나의 태낭은 20주 이후까지 지속되었으나 남은 태낭은 유산된 경우(복합 임신으로 진단 후 치료, 이후 정상 임신은 지속한 경우 포함) (no of partial pregnancy losses)
3. 추적 관찰 실패라 함은 자궁 내 임신이 임상적으로 확인되었으나, 임신 결과(유산 또는 분만)를 확인하지 못한 임신 수
4. 입력 시 최대한 관련 항목에 빈틈없이 입력해주시시오.
  - A. 특정 항목에 관한 시술이 할 수 있으나 케이스가 없는 경우, 빈칸으로 두지 말고 '0'이라고 표기하십시오.
  - B. 시술이 할 수 있으나 케이스가 없는 경우, 빈칸으로 두지 말고 '0'이라고 표기하십시오.
  - C. 특정 항목에 관한 자료를 시행하지 않거나 알 수 없는 경우, 해당 없음(또는 NA)으로 표기해주시시오.
  - D. 어떠한 항목도 빈칸으로 두지 마세요.

ii. 입력 항목

|                                                                               |              | 총 수 |
|-------------------------------------------------------------------------------|--------------|-----|
| 고식적 IVF로 생성된 배아를 이식한 주기 총 수(transfer cycle)                                   |              |     |
| 고식적 IVF로 생성된 배아를 이식하여 확인된 임상적 임신 총 수(clinical pregnancies)                    |              |     |
| 고식적 IVF로 생성된 배아 이식으로 확인된 임상적 임신이 (모두) 유산된 경우의 총 수(no of all pregnancy losses) |              |     |
| 고식적 IVF로 배아 이식으로 확인된 임상적 임신이 (부분) 유산된 경우의 총 수(no of partial pregnancy losses) |              |     |
| 고식적 IVF로 생성된 배아 이식으로 확인된 임상적 임신이 지속되어 분만으로 이어진 경우의 총 수(deliveries: Total)     |              |     |
|                                                                               | 단태아 분만 건수    |     |
|                                                                               | 쌍태아 분만 건수    |     |
|                                                                               | 삼태아 분만 건수    |     |
|                                                                               | 사태아 이상 분만 건수 |     |
| 추적 관찰 실패 건수*                                                                  |              |     |

\*추적 관찰 실패라 함은 자궁 내 임신이 임상적으로 확인되었으나, 임신 결과(유산 또는 분만)를 확인하지 못한 임신 수.



D. ICSI 시술로 인한 분만 수

i. 입력 시 주의 사항

1. 입력 항목은 신생아 수가 아닌 분만 수입니다.
  - A. 즉, 쌍둥이 분만을 한 경우, 2가 아닌 1로 입력해야 합니다.
  - B. 또한 삼태아 분만인 경우도 3이 아닌 1로 입력해야 합니다.
2. 유산이라 함은 자궁 내 임신이 임상적으로 확인되었으나, 임신 20주 이전 유산된 경우(인공 유산과 자연 유산, 자궁 외 임신을 포함)
  - A. 모두 유산된 경우라 함은 정상 임신낭이 여러 개 또는 한 개가 관찰되었으나, 모두 유산되어 임신이 조기 종결된 경우 (no of all pregnancy losses)
  - B. 부분 유산된 경우라 함은 정상 임신낭이 여러 개가 관찰되었으나, 이 중 하나의 태낭은 20주 이후까지 지속되었으나 남은 태낭은 유산된 경우(복합 임신으로 진단 후 치료, 이후 정상 임신은 지속한 경우 포함) (no of partial pregnancy losses)
3. 추적 관찰 실패라 함은 자궁 내 임신이 임상적으로 확인되었으나, 임신 결과(유산 또는 분만)를 확인하지 못한 임신 수
4. 입력 시 최대한 관련 항목에 빈틈없이 입력해주십시오.
  - A. 특정 항목에 관한 시술이 할 수 있으나 케이스가 없는 경우, 빈칸으로 두지 말고 '0'이라고 표기하십시오.
  - B. 시술이 할 수 있으나 케이스가 없는 경우, 빈칸으로 두지 말고 '0'이라고 표기하십시오.
  - C. 특정 항목에 관한 자료를 시행하지 않거나 알 수 없는 경우, 해당 없음(또는 NA)으로 표기하십시오.
  - D. 어떠한 항목도 빈칸으로 두지 마세요.

ii. 입력 항목

|                                                                                |              | 총 수 |
|--------------------------------------------------------------------------------|--------------|-----|
| ICSI로 생성된 배아를 이식한 주기 총 수(transfer cycle)                                       |              |     |
| ICSI로 생성된 배아를 이식하여 확인된 임상적 임신 총 수(clinical pregnancies)                        |              |     |
| ICSI로 생성된 배아 이식으로 확인된 임상적 임신이 (모두) 유산된 경우의 총 수(no of all pregnancy losses)     |              |     |
| ICSI로 생성된 배아 이식으로 확인된 임상적 임신이 (부분) 유산된 경우의 총 수(no of partial pregnancy losses) |              |     |
| ICSI로 생성된 배아 이식으로 확인된 임상적 임신이 지속되어 분만으로 이어진 경우의 총 수(deliveries: Total)         |              |     |
|                                                                                | 단태아 분만 건수    |     |
|                                                                                | 쌍태아 분만 건수    |     |
|                                                                                | 삼태아 분만 건수    |     |
|                                                                                | 사태아 이상 분만 건수 |     |
| 추적 관찰 실패 건수*                                                                   |              |     |

\*추적 관찰 실패라 함은 자궁 내 임신이 임상적으로 확인되었으나, 임신 결과(유산 또는 분만)를 확인하지 못한 임신 수.

## ■ 냉동 배아 이식 시술에 따른 임신 결과

### A. 임신 결과 입력 항목

i. "2013년 1월1일 냉동으로 보관된 배아 총 수"라 함은 언제 채취하여 냉동하든 날짜와 상관없이, 해당 클리닉에서 현재 2013년 1월 1일 냉동 보관 중이었던 배아 개수를 말합니다.

#### ii. 입력 시 주의 사항

1. 이 테이블에는 냉동 배아 이식 주기만이 입력 대상입니다.

A. ICSI를 시행하지 않고 고식적인 체외 수정만 얻은 배아를 냉동하여 이식한 경우를 고식적-FET라 합니다.

B. ICSI를 시행하여 얻은 배아를 냉동하여 이식한 경우를 ICSI-FET라 합니다.

2. 입력 시 최대한 관련 항목에 빈틈없이 입력해주시시오.

A. 특정 항목에 관한 시술이 할 수 있으나 케이스가 없는 경우, 빈칸으로 두지 말고 '0'이라고 표기하십시오.

B. 특정 항목에 관한 자료를 시행하지 않거나 알 수 없는 경우, 해당 없음(또는 NA)으로 표기해주시시오.

C. 어떠한 항목도 빈칸으로 두지 마세요.

#### iii. 입력 항목

##### 1. 일반적인 항목

|                                      | 개수 |
|--------------------------------------|----|
| 2010년 난자 채취 후 배아 냉동을 한 주기 수          |    |
| 2010년 난자 채취 후 생성된 배아 중 냉동으로 보관된 배아 수 |    |
| 2013년 1월 1일 냉동으로 보관된 배아 총 수          |    |

##### 2. 특수 항목

|                            | 고식적 FET:<br>embryos obtained after IVF without ICSI (n) | ICSI-FET:<br>embryos obtained after IVF with ICSI (n) |
|----------------------------|---------------------------------------------------------|-------------------------------------------------------|
| 배아를 해동한 주기 총 수(해동 주기)      |                                                         |                                                       |
| 배아 이식 자료                   | 이 칸에는 아무런 숫자도 입력하지 않아야 합니다.                             |                                                       |
| 1개 배아 이식 주기 수(cycle)       | A)                                                      |                                                       |
| 2개 배아 이식 주기 수(cycle)       | B)                                                      |                                                       |
| 3개 배아 이식 주기 수(cycle)       | C)                                                      |                                                       |
| 4개 배아 이식 주기 수(cycle)       | D)                                                      |                                                       |
| 5개 배아 이식 주기 수(cycle)       | E)                                                      |                                                       |
| 6개 배아 이상 이식 주기 수(cycle)    | F)                                                      |                                                       |
| 냉동 배아 이식 시행 총 시술 주기(이식 주기) | (A+B+C+D+E+F)                                           |                                                       |

B. 이식 배아 수에 따른 임상적 임신율

i. 입력 시 주의 사항

1. (고식적 IVF 생성 배아 + ICSI 생성 배아) 모두 다 합하여 입력합니다.
2. 임상적 임신(clinical pregnancy)은 초음파에서 자궁 내 태낭을 확인한 경우로 제한됩니다.
  - A. 개별 테이블에 기재토록 하고 있는 임상적 임신(clinical pregnancy)은 2010년에 시행한 시술 주기에서 임신이 성립된 경우를 말하며, 혈중  $\beta$ -hCG만의 상승이 있는 화학적 임신은 포함되지 않습니다.
    - i. 초음파 검사상 자궁 내(intrauterine) 임신낭이 보인 경우만 임상적 임신(clinical pregnancy)에 포함
    - ii. 자궁 외 임신은 제외
3. 유산이라 함은 자궁 내 임신이 임상적으로 확인되었으나, 임신 20주 이전 유산된 경우(인공 유산과 자연 유산, 자궁 외 임신을 포함)
  - A. 모두 유산된 경우라 함은 정상 임신낭이 여러 개 또는 한 개가 관찰되었으나, 모두 유산되어 임신이 조기 종결된 경우 (no of all pregnancy losses)
  - B. 부분 유산된 경우라 함은 정상 임신낭이 여러 개가 관찰되었으나, 이 중 하나의 태낭은 20주 이후까지 지속되었으나 남은 태낭은 유산된 경우(복합 임신으로 진단 후 치료, 이후 정상 임신은 지속한 경우 포함) (no of partial pregnancy losses)
4. 추적 관찰 실패라 함은 자궁 내 임신이 임상적으로 확인되었으나, 임신 결과(유산 또는 분만)를 확인하지 못한 임신 수

ii. 입력 항목

|                                       | 해동 배아 이식 수                  |   |   |   |   |     | Total |
|---------------------------------------|-----------------------------|---|---|---|---|-----|-------|
|                                       | 1                           | 2 | 3 | 4 | 5 | ≥ 6 |       |
| 이식 주기 총 수                             |                             |   |   |   |   |     |       |
| 임상적 임신 (1+2+3)                        |                             |   |   |   |   |     |       |
| 모두 유산된 경우<br>(No of all abortion)     |                             |   |   |   |   |     |       |
| 부분 유산된 경우<br>(No of partial abortion) |                             |   |   |   |   |     |       |
| 태낭                                    | 이 칸에는 아무런 숫자도 입력하지 않아야 합니다. |   |   |   |   |     |       |
| 1개 태낭 <sup>1)</sup>                   |                             |   |   |   |   |     |       |
| 2개 태낭 <sup>2)</sup>                   |                             |   |   |   |   |     |       |
| 3개 이상 태낭 <sup>3)</sup>                |                             |   |   |   |   |     |       |
| 추적 관찰 실패 건수*                          |                             |   |   |   |   |     |       |

\*추적 관찰 실패라 함은 자궁 내 임신이 임상적으로 확인되었으나, 임신 결과(유산 또는 분만)를 확인하지 못한 임신 수.

C. 냉동 배아 이식으로 인한 분만 수

i. 입력 시 주의 사항

1. 입력 항목은 신생아 수가 아닌 분만 수입니다.
  - A. 즉, 쌍둥이 분만을 한 경우, 2가 아닌 1로 입력해야 합니다.
  - B. 또한 삼태아 분만인 경우도 3이 아닌 1로 입력해야 합니다.
2. 유산이라 함은 자궁 내 임신이 임상적으로 확인되었으나, 임신 20주 이전 유산된 경우(인공 유산과 자연 유산, 자궁 외 임신을 포함)
  - A. 모두 유산된 경우라 함은 정상 임신낭이 여러 개 또는 한 개가 관찰되었으나, 모두 유산되어 임신이 조기 종결된 경우 (no of all pregnancy losses)
  - B. 부분 유산된 경우라 함은 정상 임신낭이 여러 개가 관찰되었으나, 이 중 하나의 태낭은 20주 이후까지 지속되었으나 남은 태낭은 유산된 경우(복합 임신으로 진단 후 치료, 이후 정상 임신은 지속한 경우 포함) (no of partial pregnancy losses)
3. 추적 관찰 실패라 함은 자궁 내 임신이 임상적으로 확인되었으나, 임신 결과(유산 또는 분만)를 확인하지 못한 임신 수
4. 입력 시 최대한 관련 항목에 빈틈없이 입력해주십시오.
  - A. 특정 항목에 관한 시술이 할 수 있으나 케이스가 없는 경우, 빈칸으로 두지 말고 '0'이라고 표기하십시오.
  - B. 시술이 할 수 있으나 케이스가 없는 경우, 빈칸으로 두지 말고 '0'이라고 표기하십시오.
  - C. 특정 항목에 관한 자료를 시행하지 않거나 알 수 없는 경우, 해당 없음(또는 NA)으로 표기하십시오.
  - D. 어떠한 항목도 빈칸으로 두지 마세요.

ii. 입력 항목

|                                                                        |              | 총 수 |
|------------------------------------------------------------------------|--------------|-----|
| FET를 시행한 주기 총 수(transfer cycle)                                        |              |     |
| FET를 시행하여 확인된 임상적 임신 총 수(clinical pregnancies)                         |              |     |
| FET를 시행하여 확인된 임상적 임신이 (모두) 유산된 경우의 총 수(no of all pregnancy losses)     |              |     |
| FET를 시행하여 확인된 임상적 임신이 (부분) 유산된 경우의 총 수(no of partial pregnancy losses) |              |     |
| FET를 시행하여 확인된 임상적 임신이 지속되어 분만으로 이어진 경우의 총 수(deliveries: Total)         |              |     |
|                                                                        | 단태아 분만 건수    |     |
|                                                                        | 쌍태아 분만 건수    |     |
|                                                                        | 삼태아 분만 건수    |     |
|                                                                        | 사태아 이상 분만 건수 |     |
| 추적 관찰 실패 건수*                                                           |              |     |

\*추적 관찰 실패라 함은 자궁 내 임신이 임상적으로 확인되었으나, 임신 결과(유산 또는 분만)를 확인하지 못한 임신 수.

■ 시술 받은 여성의 나이에 따른 시술 종류

A. 입력 시 주의 사항

i. IVF+ ICSI에 관한 내용 중 중요 내용

1. 난자를 대상으로 고식적 채취 수정과 ICSI 수정을 동시에 사용한 경우를 칭합니다.

A. 이 경우, 이식된 배아가 생성된 수정 방법을 기준으로 한다.

(for cycles where both conventional IVF and ICSI were used, report cycle in the column of the technique that resulted in the transferred embryos)

i. 즉, 채취 난자를 대상으로 half ICSI(IVF+ICSI)를 했으나 이식된 배아가 고식적 IVF로 생성된 배아인 경우, 고식적 IVF 주기로 한다.

ii. 어떤 배아를 이식했는지 모르거나, 고식적 배아와 ICSI 배아를 모두 이식한 경우는 ICSI 주기로 한다.

(if both type of embryos were transferred, count as ICSI)

ii. 난자 채취한 주기(aspiration)에는 채취를 시도했으나 난자가 나오지 않는 경우도 포함됩니다.

iii. PGD 또는 PGS를 시행한 주기는 제외됩니다(별도 입력 테이블 존재).

iv. 시술 관련 약물 투여 당시의 여성의 나이가 기준이 됩니다.

1. 1976년생이 2010년에 보조생식시술을 받은 경우, 해당 여성은 34세입니다.

v. 입력 시 최대한 관련 항목에 빈틈없이 입력해주세요.

1. 특정 항목에 관한 시술이 할 수 있으나 케이스가 없는 경우, 빈칸으로 두지 말고 '0'이라고 표기하십시오.

2. 특정 항목에 관한 자료를 시행하지 않거나 알 수 없는 경우, 해당 없음(또는 NA)으로 표기해주세요.

3. 어떠한 항목도 빈칸으로 두지 마세요.

B. 신선 주기 입력(fresh cycle)

| 여성 나이           | 고식적 IVF   |           |          |          | ICSI      |           |          |          | IVF+ICSI  |           |          |          |
|-----------------|-----------|-----------|----------|----------|-----------|-----------|----------|----------|-----------|-----------|----------|----------|
|                 | 난자 채취 (n) | 이식 주기 (n) | 임신 수 (n) | 분만 수 (n) | 난자 채취 (n) | 이식 주기 (n) | 임신 수 (n) | 분만 수 (n) | 난자 채취 (n) | 이식 주기 (n) | 임신 수 (n) | 분만 수 (n) |
| 24세 이하          | a)        |           |          |          |           |           |          |          |           |           |          |          |
| 25-29           | b)        |           |          |          |           |           |          |          |           |           |          |          |
| 30-34           | c)        |           |          |          |           |           |          |          |           |           |          |          |
| 35-39           | d)        |           |          |          |           |           |          |          |           |           |          |          |
| 40세 이상          | e)        |           |          |          |           |           |          |          |           |           |          |          |
| 총 수<br>a+b+c+d) |           |           |          |          |           |           |          |          |           |           |          |          |

C. 해동 배아 이식 주기 입력(frozen embryos transfer cycle)

| 여성 나이           | 고식적 IVF로 생성된 냉동 배아를 이식한 주기 |      |      | ICSI로 생성된 냉동 배아를 이식한 주기 |      |      | IVF+ICSI 모두를 이용하여 생성된 냉동 배아를 이식한 주기 |      |      |
|-----------------|----------------------------|------|------|-------------------------|------|------|-------------------------------------|------|------|
|                 | 해동 주기 수                    | 임신 수 | 분만 수 | 해동 주기 수                 | 임신 수 | 분만 수 | 해동 주기 수                             | 임신 수 | 분만 수 |
| 24세 이하          | a)                         |      |      |                         |      |      |                                     |      |      |
| 25-29           | b)                         |      |      |                         |      |      |                                     |      |      |
| 30-34           | c)                         |      |      |                         |      |      |                                     |      |      |
| 35-39           | d)                         |      |      |                         |      |      |                                     |      |      |
| 40세 이상          | e)                         |      |      |                         |      |      |                                     |      |      |
| 총 수<br>a+b+c+d) |                            |      |      |                         |      |      |                                     |      |      |

■ PGD에 관한 보고

A. 입력 시 주의 사항

1. PGD 항목에는 polar body, blastomere, trophoctoderm 분석이 모두 포함되며, 특정 유전 질환 유무를 확인하기 위해 시행된 경우를 말합니다. (analysis of polar bodies, blastomeres, or trophoctoderm from oocytes, zygotes, or embryos for the detection of specific genetic, structural, and/or chromosomal alternations: PGD)
2. 입력 시 최대한 관련 항목에 빈틈없이 입력해주세요.
  - A. 특정 항목에 관한 시술이 할 수 있으나 케이스가 없는 경우, 빈칸으로 두지 말고 '0'이라고 표기하십시오.
  - B. 특정 항목에 관한 자료를 시행하지 않거나 알 수 없는 경우, 해당 없음(또는 NA)으로 표기해주세요.
  - C. 어떠한 항목도 빈칸으로 두지 마세요.
  - D. 시술 관련 약물 투여 당시의 여성의 나이가 기준이 됩니다.

B. 입력 항목

|                          | 여성의 나이 |       |      |         |       |
|--------------------------|--------|-------|------|---------|-------|
|                          | ≤ 34   | 35-39 | ≥ 40 | Unknown | Total |
| 시작 주기                    |        |       |      |         |       |
| 난자 채취 주기                 |        |       |      |         |       |
| 배아 이식 주기                 |        |       |      |         |       |
| 검사한 배아 수                 |        |       |      |         |       |
| 정상 배아 수                  |        |       |      |         |       |
| 이식 배아 수                  |        |       |      |         |       |
| 임상적 임신 수                 |        |       |      |         |       |
| 총 분만 수 (1+2+3+4)         |        |       |      |         |       |
| 단태 분만 건수 <sup>1</sup>    |        |       |      |         |       |
| 쌍태 분만 건수 <sup>2</sup>    |        |       |      |         |       |
| 삼태 분만 건수 <sup>3</sup>    |        |       |      |         |       |
| 사태 이상 분만 건수 <sup>4</sup> |        |       |      |         |       |

■ 난자 냉동에 관한 보고

A. 입력 시 주의 사항

- i. 난자 냉동이 일어난 모든 주기 수를 기록합니다(Only report the numbers of cycles with freezing).
- ii. 보조생식술 동안 일어난 난자 냉동(freezing during an ART cycle)이란, 해당 주기에 임신을 도모하기 위한 초기 목적으로 보조생식술을 하는 동안 채취한 난자를 냉동한 경우를 말한다.
- iii. 가임력 보존을 위해 난자를 냉동한 경우(cycles performed for Fertility preservation only)란, 난자 채취 목적이 가임력 보존인 경우를 말한다.
  - 1. 사회적 이유는 의학 외적 이유(non-medical reasons) 모두를 포함합니다.
  - 2. 의학적 이유에는 암/만성질환, 수정시킬 정자가 부족하여 난자를 냉동한 경우 등이 포함될 수 있습니다.  
(Cancer or other major medical disease)
- iv. 입력 시 최대한 관련 항목에 빈틈없이 입력해주시시오.
  - 1. 특정 항목에 관한 시술이 할 수 있으나 케이스가 없는 경우, 빈칸으로 두지 말고 '0'이라고 표기하십시오.
  - 2. 특정 항목에 관한 자료를 시행하지 않거나 알 수 없는 경우, 해당 없음(또는 NA)으로 표기해주시시오.
  - 3. 어떠한 항목도 빈칸으로 두지 마세요.

B. 입력 항목

| 난자 냉동 주기 수 (A+B+C) | 보조생식술 동안 일어난 난자 냉동 | 가임력 보존을 위해 난자를 냉동한 경우 |        |
|--------------------|--------------------|-----------------------|--------|
|                    |                    | 의학적 이유                | 사회적 이유 |
|                    | A)                 | B)                    | C)     |



■ 체외 성숙(IVM)에 관한 보고

A. 체외 성숙이라 함은(FSH & hCG priming 유무와 상관없이) 초기 난포기에 미성숙 난자를 채취하여 최소 1일 이상 난자를 체외에서 성숙시킨 후 배아를 생성시킨 경우를 말합니다.

B. 입력 시 주의 사항

- i. 수치만을 입력합니다.
- ii. 난자 채취한 주기(aspiration)에는 채취를 시도했으나 난자가 나오지 않는 경우도 포함됩니다.
- iii. 입력 시 최대한 관련 항목에 빈틈없이 입력해주시시오.
  - 1. 특정 항목에 관한 시술이 할 수 있으나 케이스가 없는 경우, 빈칸으로 두지 말고 '0'이라고 표기하십시오.
  - 2. 특정 항목에 관한 자료를 시행하지 않거나 알 수 없는 경우, 해당 없음(또는 NA)으로 표기해주시시오.
  - 3. 어떠한 항목도 빈칸으로 두지 마세요.

C. 입력 항목

|                 | 난자 채취 수(n) | 배아 이식 수(n) | 임상적 임신 수(n) | 분만 수(n) |
|-----------------|------------|------------|-------------|---------|
| 체외성숙 시도 주기(IVM) |            |            |             |         |

## ■ 난자 기증(OD)에 관한 보고

### A. 입력 시 주의 사항

- i. 유산이라 함은 자궁 내 임신이 임상적으로 확인되었으나, 임신 20주 이전 유산된 경우(인공 유산과 자연 유산, 자궁 외 임신을 포함).
  - A. 모두 유산된 경우라 함은 정상 임신낭이 여러 개 또는 한 개가 관찰되었으나, 모두 유산되어 임신이 조기 종결된 경우 (no of all pregnancy losses)
  - B. 부분 유산된 경우라 함은 정상 임신낭이 여러 개가 관찰되었으나, 이 중 하나의 태낭은 20주 이후까지 지속되었으나 남은 태낭은 유산된 경우(복합 임신으로 진단 후 치료, 이후 정상 임신은 지속한 경우 포함) (no of partial pregnancy losses)
- ii. 수치만을 입력합니다.
- iii. 난자 기증을 시도한 횟수란 기증자에게 난자 채취를 위해 약물 투여를 시도한 경우를 말합니다.
- iv. 추적 관찰 실패라 함은 자궁 내 임신이 임상적으로 확인되었으나, 임신 결과(유산 또는 분만)를 확인하지 못한 임신 수
- v. 입력 시 최대한 관련 항목에 빈틈없이 입력해주시시오.
  - 1. 특정 항목에 관한 시술이 할 수 있으나 케이스가 없는 경우, 빈칸으로 두지 말고 '0'이라고 표기하십시오.
  - 2. 특정 항목에 관한 자료를 시행하지 않거나 알 수 없는 경우, 해당 없음(또는 NA)으로 표기해주시시오.
  - 3. 어떠한 항목도 빈칸으로 두지 마세요.

### B. 입력 항목

|                                                                                         |                | Total |
|-----------------------------------------------------------------------------------------|----------------|-------|
| 난자 기증을 시도한 횟수(cycle donation)                                                           |                |       |
| 난자 기증으로 생성된 배아를 이식한 횟수(Transfer cycles)                                                 |                |       |
|                                                                                         | 1개 배아 이식 건수    |       |
|                                                                                         | 2개 배아 이식 건수    |       |
|                                                                                         | 3개 배아 이식 건수    |       |
|                                                                                         | 4개 배아 이식 건수    |       |
|                                                                                         | 5개 배아 이식 건수    |       |
|                                                                                         | 6개 이상 배아 이식 건수 |       |
| 난자기증을 이용하여 확인된 임상적 임신 총 수(clinical pregnancies)                                         |                |       |
| 난자기증을 이용하여 생성된 배아 이식으로 확인된 임상적 임신이 (모두) 유산된 경우의 총 수<br>(no of all pregnancy losses)     |                |       |
| 난자기증을 이용하여 생성된 배아 이식으로 확인된 임상적 임신이 (부분) 유산된 경우의 총 수<br>(no of partial pregnancy losses) |                |       |
| 난자기증을 이용하여 확인된 임상적 임신이 지속되어 분만으로 이어진 경우의 총 수<br>(deliveries: Total = 1+2+3+4)           |                |       |
|                                                                                         | 단태아 분만 건수1     |       |
|                                                                                         | 쌍태아 분만 건수2     |       |
|                                                                                         | 삼태아 분만 건수3     |       |
|                                                                                         | 사태아 이상 분만 건수4  |       |
| 추적 관찰 실패 건수*                                                                            |                |       |

\*추적 관찰 실패라 함은 자궁 내 임신이 임상적으로 확인되었으나, 임신 결과(유산 또는 분만)를 확인하지 못한 임신 수.

■ 태아감수술(SFR)에 관한 보고

A. 입력 시 주의 사항

i. 입력 시 최대한 관련 항목에 빈틈없이 입력해주시시오.

1. 특정 항목에 관한 시술이 할 수 있으나 케이스가 없는 경우, 빈칸으로 두지 말고 '0'이라고 표기하십시오.
2. 특정 항목에 관한 자료를 시행하지 않거나 알 수 없는 경우, 해당 없음(또는 NA)으로 표기해주시시오.
3. 어떠한 항목도 빈칸으로 두지 마세요.

B. 입력 항목

|                    |          | 시행 건수 |
|--------------------|----------|-------|
| 고식적 IVF 배아로 임신한 경우 | 쌍태 임신    |       |
|                    | 삼태 임신    |       |
|                    | 사태 이상 임신 |       |
| ICSI 배아로 임신한 경우    | 쌍태 임신    |       |
|                    | 삼태 임신    |       |
|                    | 사태 이상 임신 |       |
| 해동 배아로 임신한 경우      | 쌍태 임신    |       |
|                    | 삼태 임신    |       |
|                    | 사태 이상 임신 |       |
| 난자 기증으로 임신한 경우     | 쌍태 임신    |       |
|                    | 삼태 임신    |       |
|                    | 사태 이상 임신 |       |

■ 체외수정시술 합병증에 관한 보고

A. 입력 시 주의 사항

- i. 병원에 입원하거나, 의학적 처치가 필요할 정도의 합병증을 말합니다.
  - 1. 동일한 증상을 각기 다른 주기에 2번 겪은 경우, 2회로 취급합니다.  
(If a woman had two occurrences of the same complication, in 2 different cycles, count her twice)
  - 2. 서로 다른 증상을 동일 주기에 겪은 경우, 각각 1회씩 2번 기재합니다.  
(If a woman had two different complications, count her in each of them)
  - 3. 출혈이란 입원을 할 정도이거나 수혈을 할 정도의 출혈입니다.  
(Report bleeding if patient required a blood transfusion and/or was hospitalized)
  - 4. 감염이란 정맥 항생제나 근육항생제를 맞아야 할 정도이거나, 입원을 해야 하는 경우를 말합니다.  
(Report infection if patient required intravenous/intramuscular antibiotics and/or was hospitalized)
- ii. 입력 시 최대한 관련 항목에 빈틈없이 입력해주세요.
  - 1. 특정 항목에 관한 시술이 할 수 있으나 케이스가 없는 경우, 빈칸으로 두지 말고 '0'이라고 표기하십시오.
  - 2. 특정 항목에 관한 자료를 시행하지 않거나 알 수 없는 경우, 해당 없음(또는 NA)으로 표기해주세요.
  - 3. 어떠한 항목도 빈칸으로 두지 마세요.

B. 입력 항목

|              | 총 수(n) |
|--------------|--------|
| 난소과자극 증후군    |        |
| 난자채취 합병증 총 수 |        |
| 출혈           |        |
| 감염           |        |
| 사망           |        |

■ 정자 채취 방법에 관한 보고

A. 입력 시 주의 사항

- i. <sup>1</sup>특수한 방법으로 채취된 정자를 이용하여 배아 생성을 하고자 난자를 자극을 시도한 횟수(No of oocytes retrieval cycles attempted)
- ii. <sup>2</sup>특수한 방법으로 채취된 정자를 이용하여 생성된 배아를 이식한 횟수(Transfer cycles)
- iii. <sup>3</sup>임상적 임신(Clinical pregnancy) 는 초음파에서 자궁 내 태낭을 확인한 경우로 제한됩니다
- iv. <sup>4</sup>임상적 임신이 지속되어 단태아 이상의 분만으로 이어진 경우의 총수를 말한다(No of pregnancies with one or more live births).
- v. <sup>5</sup>추적 관찰 실패라 함은 자궁 내 임신이 임상적으로 확인되었으나, 임신 결과(유산 또는 분만)을 확인하지 못한 임신 수
- vi. 입력 시 최대한 관련 항목에 빈틈없이 입력해주시시오.
  - 1. 특정 항목에 관한 시술이 할 수 있으나 케이스가 없는 경우, 빈칸으로 두지 말고 '0'이라고 표기하십시오.
  - 2. 특정 항목에 관한 자료를 시행하지 않거나 알 수 없는 경우, 해당 없음(또는 NA)으로 표기해주시시오.
  - 3. 어떠한 항목도 빈칸으로 두지 마세요.

B. 입력 항목

| 채취 방법                                           | <sup>1</sup> 난자 채취 총수 | <sup>2</sup> 이식 주기 총수 | <sup>3</sup> 임상적 임신 총수 | 유산 수 | <sup>4</sup> 임상적 임신이 지속되어 단태아 이상의 분만으로 이어진 경우의 총수 | <sup>5</sup> 추적 관찰 실패 수 |
|-------------------------------------------------|-----------------------|-----------------------|------------------------|------|---------------------------------------------------|-------------------------|
| Percutaneous Epididymal Sperm Aspiration (PESA) |                       |                       |                        |      |                                                   |                         |
| Testicular sperm extraction (TESE)              |                       |                       |                        |      |                                                   |                         |
| Microepididymal sperm aspiration (MESA)         |                       |                       |                        |      |                                                   |                         |
| Other and unspecified techniques                |                       |                       |                        |      |                                                   |                         |
| Assisted hatching                               |                       |                       |                        |      |                                                   |                         |

## Q&A (2013-7-12)

Q) 신선 주기 2010년 기준은 약물투여 시작일 기준이 아닌 2010.1.1-2010.12.31 난자를 채취한 자료입니다. 모든 자료를 채취일 기준으로 정리되어 있어 약물투여 시작 기준의 자료가 없습니다. “약물 투여를 시작한 주기 총 수”는 현재로서는 파악 불가능합니다.

답) 자료 성격을 2가지로 구분하였습니다.

Q) 신선 주기 배아에서 IVM은 제외하는 것이죠? IVM은 따로 테이블이 있지만 신선 주기 제외 항목에 없어 혹시나 해서요?

답) IVM을 시행한 경우, IVF/ICSI 주기에 입력해야 합니다.

예를 들어,

IVM 시행 후 난자 배양, 이후 IVF로 배아를 생성 fresh ET를 한 경우, IVF 주기에 기재

IVM 시행 후 난자 배양, 이후 ICSI로 배아를 생성 fresh ET를 한 경우, ICSI 주기에 기재

[Reference:

Assisted hatching (AH) and in vitro maturation (IVM) should be included in the column of the relevant fertilization technique (IVF or ICSI)]

Q) “2013년 1월1일 냉동으로 보관된 배아 총 수”라 함은 2010년 채취-냉동하여 2012년 12월 31일까지 해동 후 2013년 1월 1일 기준 보유 수를 의미하는 것이지요?

답) 아니요.

언제 채취하여 냉동하던 날짜와 상관없이, 해당 클리닉에서 현재 2013년 1월 1일 냉동 보관 중이었던 배아 개수를 말합니다.

선생님이 말씀하신 항목은 두 번째인 ‘2010년 난자 채취 후 생성된 배아 중 냉동으로 보관된 배아 수’를 말하며, 기준이 되는 날짜는 2013년 1월 1일입니다.

Q) 배아 냉동-해동 이식의 자료들은 난자 냉동은 제외하는 것이 맞는지요?

답) 네. 난자 냉동은 따로 기재해야 합니다.

배아 냉동 항목에는 배아만을 기재합니다.

Q) 난자 냉동은 제외일 경우 난자를 해동한 것과 분열기 혹은 포배기 배아를 동시에 해동하여 이식한 경우는 냉동-해동 데이터에도 포함하고 난자 냉동 데이터에도 포함시키면 되는지요?

답) 네. 둘 다 기재하시면 됩니다.

난자 냉동에는 냉동 이유로 인해 분류만 기재합니다.

Q) 두 번의 각기 신선 배아 주기에서 생성된 배아를 동시에 해동하여 이식할 경우 두 신선 주기 수정방법이 다를 시 어떻게 처리하면 될까요?

답) ICSI-FET입니다.

서로 다른 방식으로 생성된 배아를 해동하고 이후 섞어 이식을 한 경우 ICSI-FET입니다.

[Reference:

“어떤 배아를 이식했는지 모르거나, 고식적 배아와 ICSI 배아를 모두 이식한 경우는 ICSI IVF 주기로 한다”에 준용합니다.]

Q) 유산 칸에는 20주 이전 유산의 경우 포함시키라고 되어있는데 그럼 20주 이후 유산은 어디에 기록하면 되나요?

답) 20주 이후는 사산(stillbirth)입니다. 현재 데이터에서는 사산은 입력 대상이 아닙니다.

Q) 추적 관찰 실패 칸은 임상적 임신은 확인 되었으나 분만을 추적하지 못한 경우 포함인데 이럴 경우 임신에서 수를 포함시키고 추적 관찰 실패에도 수를 포함시키는 것인지 분만까지 정확히 확인하지 못한 경우 추적 관찰 실패에 포함시키고 임신에는 포함시키는 말라는 의미인가요?

답) 임신 수치와 추적 관찰 실패에 수를 모두 입력합니다.

Q) GIFT가 들어간다면 ZIFT, TET (Tubal Embryo Transfer)도 많은 case는 아니지만 아직도 시행하고 있으므로 내용이 들어가야 한다고 생각합니다.  
답) ICMART에서 ZIFT와 TET를 최근에 제외시켰습니다.

Q) TESA, TESE 등의 항목은 빠지는지 궁금합니다.  
답) PESA까지 합하여 마지막 항목에 추가하였습니다.

Q) 정상 임신낭이 여러 개 관찰된 경우 일부는 잘 자라 출산하였지만 그중 1-2개의 태낭은 자연 혹은 인공유산의 경우 임신에는 당연히 포함되지만 유산에도 수를 포함하는지 여부.

답) 다음과 같이 나누어 보고토록 하였습니다.  
유산된 경우를 (모두 유산된 경우)+(부분 유산된 경우)라 구분을 하고 다음과 같이 정의하였습니다.  
- 모두 유산된 경우라 함은 정상 임신낭이 여러 개 또는 한 개가 관찰되었으나, 모두 유산되어 임신이 조기 종결된 경우  
- 부분 유산된 경우라 함은 정상 임신낭이 여러 개가 관찰되었으나, 이 중 하나의 태낭은 20주 이후까지 지속되었으나 남은 태낭은 유산된 경우

Q) '시술받은 여성의 나이에 따른 시술 종류'에서 IVF와 ICSI를 이식기준으로 구분 정의했는데 IVF+ICSI를 나눠 보고해야 하나요?  
답) IVF+ICSI로 나누어서 보고해야 합니다.

Q) 의학적사유, 사회적 이유를 정의해주셨으면 합니다.  
답) 의학적 이유에는 암/만성질환 등이 포함될 수 있습니다.  
사회적 이유는 "의학 외적 이유 모두를 포함합니다"로 정의했습니다.

Q) MM을 정의해 주셨으면 합니다.  
답) "(FSH & hCG priming 유무와 상관없이), 초기 난포기에 미성숙 난자를 채취하여 최소 1일 이상 난자를 체외에서 성숙시킨 후 배아를 생성하는 시술"이라 정의하였습니다.

Q) 다른 데이터는 transfer 주기 총 수를 명시하였는데, 연령에 따른 그룹에서만 initiated cycles를 대상으로 하였습니다. 맞는지요?  
답) 입력의 혼란을 피하기 위해 transfer 주기 총 수로 바꾸었습니다.
